# Supplementary material for: Oral Ingestion of Bacterially Expressed dsRNA Can Silence Genes and Cause Mortality in a Highly Invasive, Tree-Killing Pest, the Emerald Ash Borer
Source: MDPI journal article supplement (doi:10.3390/insects11070440), 2020-07-14
Supplement: s1 [file s1]

# Bacterially expressed dsRNA can silence genes and cause mortality in a highly invasive, tree-killing pest, the emerald ash borer

Ramya Shanivarsanthe Leelesh <sup>1,2</sup>, Lynne K. Rieske <sup>1</sup> and \*

## Supplemental materials

### Stability of the reference gene (dsRNA exposure)

Four candidate genes were selected as candidate reference gene (*actin-ACT*; *beta tubulin- β-TUB*; *glyceraldehyde-3-phosphate dehydrogenase, GAPDH*; *elongation factor 1α, TEF-1α*). Gene expression was analyzed in larvae exposed to dsRNA. For RNAi experiments larvae were fed with three separate dsRNA treatments (*dsHSP*, *dsSHI* and *dsGFP*). A web based tool, RefFinder which integrated all four software algorithms, GeNorm, NormFinder, BestKeeper and the delta Ct method was used to evaluate reference gene stability from the experimental data.

**Table 1.** Ranking of the candidate reference genes from dsRNA treated larvae according to value given by RefFinder. M: gene expression stability, R: Ranking, SV: stability value, SD: standard deviation, GM: geomean value.

| Gene         | GeNorm |   | NormFinder |   | BestKeeper |   | Delta-Ct |   | Comprehensive |   |
|--------------|--------|---|------------|---|------------|---|----------|---|---------------|---|
|              | M      | R | SV         | R | SD         | R | SD       | R | GM            | R |
| <i>TEF</i>   | 0.2    | 1 | 0.01       | 1 | 0.074      | 1 | 0.88     | 1 | 1             | 1 |
| <i>GAPDH</i> | 0.2    | 1 | 0.19       | 2 | 0.10       | 2 | 0.98     | 2 | 1.66          | 2 |
| <i>TUB</i>   | 0.39   | 2 | 0.54       | 3 | 0.35       | 3 | 0.98     | 2 | 2.71          | 3 |
| <i>ACT</i>   | 1.22   | 3 | 2.03       | 4 | 1.58       | 4 | 2.05     | 3 | 4             | 4 |

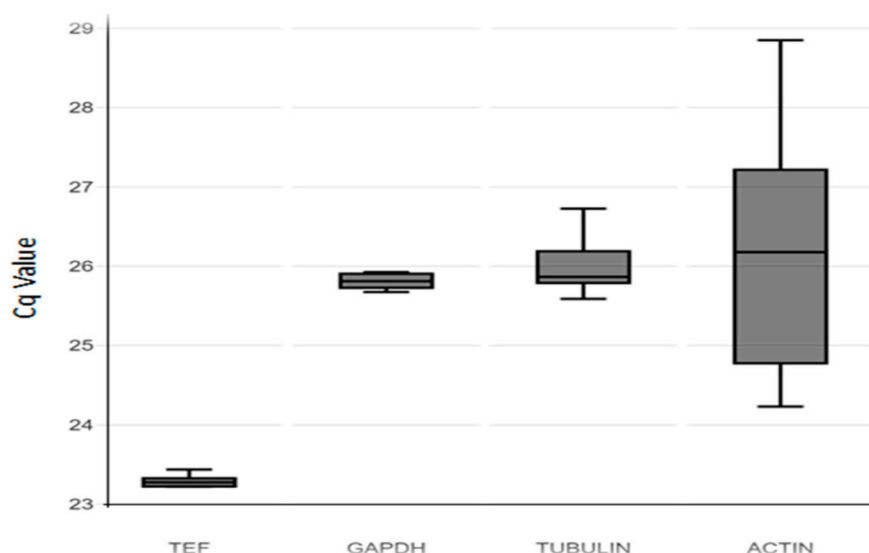

**Figure 2.** Expression profile of candidate reference gene for dsRNA exposure in *Agrilus planipennis*. Expression data are displayed as mean Ct values for each reference gene.

**Table 2.** Candidate reference genes and corresponding primer sequences. R<sup>2</sup>: correlation coefficients; Eff: Amplification efficiency.

| <b>Gene Name</b> | <b>Sequence 5'-3'</b>                                 | <b>Product Size</b> | <b>R<sup>2</sup></b> | <b>Eff %</b> |
|------------------|-------------------------------------------------------|---------------------|----------------------|--------------|
| TEF              | F- CATIGAAACCTACGTIGTCGC<br>R- ACTGGAGTGCTTAAACCTGG   | 130                 | 0.99                 | 106          |
| ACT              | F- CTTTGCCCCATGCTATACTC<br>R- TCCCTCACGATTTCCTT       | 124                 | 0.99                 | 102          |
| TUB              | F- CTCGGTGATATGCTCCAGTG<br>R- TCGTACATATTCAAGCTGGCC   | 105                 | 0.99                 | 110          |
| GAPDH            | F-GTCACGCCATAATTTACCAGAAG<br>R- AGTTTGGTATCGTTGAGGGTC | 95                  | 0.99                 | 98.6         |
